# Supplementary material for: Storm time polar cap expansion: interplanetary magnetic field clock angle dependence
Source: Copernicus journal article supplement (doi:10.5194/angeo-41-39-2023), 2023-01-16
Supplement: Supplementary file [file angeo-41-39-2023-supplement-title-page.pdf › angeo-41-39-2023-supplement-title-page.pdf]

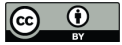

## *Supplement of*

# **Storm time polar cap expansion: interplanetary magnetic field clock angle dependence**

**Beket Tulegenov et al.**

*Correspondence to:* Joachim Raeder ([j.raeder@unh.edu](mailto:j.raeder@unh.edu))

- [angeo-41-39-2023-supplement-title-page.pdf](#)
- [data-DMSP-crossings.txt](#)

The copyright of individual parts of the supplement might differ from the article licence.
